# Supplementary material for: Doxycycline treatment of high-risk COVID-19-positive patients with comorbid pulmonary disease
Source: PubMed Central journal article supplement — Ther Adv Respir Dis. 2020 Sep 1;14:1753466620951053. doi: 10.1177/1753466620951053 (PMC7476338; doi:10.1177/1753466620951053), 2020-09-01
Supplement: Author_Response.pdf [file Author_Response.pdf]

## Author Response

Here are our responses to both reviews:

Reviewer 1:

1. We have added the Malek et al. reference (reference #6 in the manuscript) in the introduction.
2. Unfortunately we do not have inflammatory marker progression data for the four patients. Therefore it would not be possible to create such a table as proposed.

Reviewer 2:

1. We have added the following sentence (line 89) regarding the use of supplementary medications as clarification:

"There was no concomitant use of any other antibiotics, anti-viral agents, anti-malarial drugs, zinc, or any supplements postulated to be beneficial in therapy for SARS-CoV-2 in these four patients."
