# Supplementary material for: Doxycycline treatment of high-risk COVID-19-positive patients with comorbid pulmonary disease
Source: PubMed Central journal article supplement — Ther Adv Respir Dis. 2020 Sep 1;14:1753466620951053. doi: 10.1177/1753466620951053 (PMC7476338; doi:10.1177/1753466620951053), 2020-09-01
Supplement: Reviewer_1_v.1.pdf [file Reviewer_1_v.1.pdf]

Reviewer 1 v.1

Comments to the Author

A great case series study and shed the light on a potential drug against COVID-19 infection. Overall, well written manuscript.

1) Please in the introduction the following article: (Malek et al. "Doxycycline as a potential partner of COVID-19 therapies" PMID: PMC7298522).

2) It would be better to have the inflammatory markers progression after doxycycline was started in each case at baseline and on the following days, if available. Small table for the 4 cases should be fine and informative to the readers of the journal.
