# Supplementary material for: Doxycycline treatment of high-risk COVID-19-positive patients with comorbid pulmonary disease
Source: PubMed Central journal article supplement — Ther Adv Respir Dis. 2020 Sep 1;14:1753466620951053. doi: 10.1177/1753466620951053 (PMC7476338; doi:10.1177/1753466620951053), 2020-09-01
Supplement: Reviewer_2_v.1.pdf [file Reviewer_2_v.1.pdf]

Reviewer 2 v.1

Comments to the Author

Enjoyable paper and the biggest advantage is the human application. Doxycycline (DOX) is certainly in charge of positive outcome in each case. However its effect can be boosted by other medications eg. azithromycin, zinc, ascorbic acid, melatonin, vitamin D3, etc).

So my concern is based on the aforementioned data. Please update us and the future readers on supplementary medications. I wonder whether they alone or together with DOX are able to improve SARS-COV2 infection ... It would give a helpful prosperity whether DOX monotherapy or a certain combination would be more optimal in overcoming COVID-19.
